# Supplementary material for: Serum Activity Against G Protein–Coupled Receptors and Severity of Orthostatic Symptoms in Postural Orthostatic Tachycardia Syndrome
Source: PubMed Central journal article supplement — J Am Heart Assoc. 2020 Jul 30;9(15):e015989. doi: 10.1161/JAHA.120.015989 (PMC7792263; doi:10.1161/jaha.120.015989), 2020-07-30
Supplement: JAH3-9-e015989-s001.pdf [file JAH3-9-e015989-s001.pdf]

# **Supplemental Material**

**Table S1. The use of conventional POTS therapy in the POTS group.**

|               | POTS (n=45) |
|---------------|-------------|
| Droxidopa     | 33.3        |
| Beta-blockers | 35.6        |
| Procoralan    | 37.8        |
| Midodrin      | 6.7         |
| Orstanorm     | 4.4         |

Displayed as % of POTS subjects. No control subjects reported use of heart rate regulating or vasoactive medications. Data about current medications were missing for three POTS patients.

**Table S2. Serum activity against specific G-protein coupled receptors in POTS compared to healthy controls.**

|       | POTS (n = 48)     | Controls (n = 25) | p-value |
|-------|-------------------|-------------------|---------|
| ADRA1 | 1.726 ± 2.157 *   | 0.923 ± 0.871 *   | 0.006   |
| ADRB2 | 5.890 ± 5.641 *** | 2.256 ± 1.615 *   | <0.001  |
| CHRM2 | 1.861 ± 3.940 *** | 0.883 ± 1.135 *   | 0.007   |
| OPRL1 | 0.955 ± 0.857 **  | 0.640 ± 0.992     | 0.009   |

Data was analysed with Independent samples t-test. Log-transformation was applied to calculate the p-values. Receptor activity is shown as the ratio between emitted light from cleaved substrate and non-cleaved substrate and calculated as mean value ± SD of the mean. Missing values: \*n=1; \*\*n=2; \*\*\*n=3. ADRA1: adrenergic alpha-1; ADRB2: adrenergic beta-2; CHRM2: muscarinic type-2; OPRL1: opioid-receptor-like 1.

**Table S3. Correlation between different G-protein coupled receptors in POTS patients (n=48).**

|       |                     | ADRA1   | ADRB2   | CHRM2   | OPRL1   |
|-------|---------------------|---------|---------|---------|---------|
| ADRA1 | Pearson Correlation | 1       | 0.206   | 0.938** | 0.418** |
|       | p-value             |         | 0.181   | < 0.001 | 0.004   |
|       | N                   | 47      | 44      | 44      | 45      |
| ADRB2 | Pearson Correlation | 0.206   | 1       | 0.445** | 0.530** |
|       | p-value             | 0.181   |         | 0.002   | < 0.001 |
|       | N                   | 44      | 45      | 44      | 45      |
| CHRM2 | Pearson Correlation | 0.938** | 0.445** | 1       | 0.481** |
|       | p-value             | < 0.001 | 0.002   |         | 0.001   |
|       | N                   | 44      | 44      | 45      | 45      |
| OPRL1 | Pearson Correlation | 0.418** | 0.530** | 0.481** | 1       |
|       | p-value             | 0.004   | < 0.001 | 0.001   |         |
|       | N                   | 45      | 45      | 45      | 46      |

\*\* . Correlation is significant at the 0.01 level (2-tailed).

**Table S4. Correlation between different G-protein coupled receptors in controls (n=25).**

|       |                     | ADRA1   | ADRB2  | CHRM2  | OPRL1   |
|-------|---------------------|---------|--------|--------|---------|
| ADRA1 | Pearson Correlation | 1       | 0.139  | 0.490* | 0.610** |
|       | p-value             |         | 0.549  | 0.024  | 0.002   |
|       | N                   | 23      | 21     | 21     | 23      |
| ADRB2 | Pearson Correlation | 0.139   | 1      | -0.368 | 0.262   |
|       | p-value             | 0.549   |        | 0.101  | 0.228   |
|       | N                   | 21      | 23     | 21     | 23      |
| CHRM2 | Pearson Correlation | 0.490*  | -0.368 | 1      | 0.082   |
|       | p-value             | 0.024   | 0.101  |        | 0.711   |
|       | N                   | 21      | 21     | 23     | 23      |
| OPRL1 | Pearson Correlation | 0.610** | 0.262  | 0.082  | 1       |
|       | p-value             | 0.002   | 0.228  | 0.711  |         |
|       | N                   | 23      | 23     | 23     | 25      |

\*. Correlation is significant at the 0.05 level (2-tailed).

\*\*. Correlation is significant at the 0.01 level (2-tailed).

**Table S5. Orthostatic symptoms in relation to specific receptor activity in POTS (n=33) patients.**

| Dependant Variable | Independent Variable | B (per SD) | p-value | Adjusted p-value |
|--------------------|----------------------|------------|---------|------------------|
| OHQ total          | ADRA1                | 0.768      | 0.009   | 0.031            |
| OHQ total          | ADRB2                | 0.176      | 0.599   | 0.851            |
| OHQ total          | CHRM2                | 0.290      | 0.364   | 0.541            |
| OHQ total          | OPRL1                | 0.472      | 0.118   | 0.188            |
| Vision             | ADRA1                | 1.653      | < 0.001 | 0.014            |
| Vision             | ADRB2                | 1.336      | 0.011   | 0.021            |
| Vision             | CHRM2                | 1.199      | 0.014   | 0.046            |
| Vision             | OPRL1                | 1.490      | 0.003   | 0.005            |
| Dizziness          | ADRA1                | 0.358      | 0.349   | 0.234            |
| Dizziness          | ADRB2                | -0.219     | 0.586   | 0.338            |
| Dizziness          | CHRM2                | -0.049     | 0.897   | 0.673            |
| Dizziness          | OPRL1                | 0.030      | 0.937   | 0.948            |
| Weakness           | ADRA1                | 0.607      | 0.093   | 0.343            |
| Weakness           | ADRB2                | -0.100     | 0.795   | 0.609            |
| Weakness           | CHRM2                | 0.233      | 0.521   | 0.720            |
| Weakness           | OPRL1                | 0.292      | 0.433   | 0.481            |
| Fatigue            | ADRA1                | 0.196      | 0.583   | 0.546            |
| Fatigue            | ADRB2                | -0.352     | 0.363   | 0.254            |
| Fatigue            | CHRM2                | -0.245     | 0.493   | 0.449            |
| Fatigue            | OPRL1                | -0.018     | 0.960   | 0.869            |
| Concentration      | ADRA1                | 0.529      | 0.264   | 0.702            |
| Concentration      | ADRB2                | -0.042     | 0.934   | 0.792            |
| Concentration      | CHRM2                | -0.076     | 0.871   | 0.682            |
| Concentration      | OPRL1                | 0.271      | 0.570   | 0.625            |
| Head discomfort    | ADRA1                | 0.699      | 0.186   | 0.323            |
| Head discomfort    | ADRB2                | 0.592      | 0.318   | 0.797            |
| Head discomfort    | CHRM2                | 0.481      | 0.384   | 0.600            |

|                 |       |        |       |       |
|-----------------|-------|--------|-------|-------|
| Head discomfort | OPRL1 | 0.379  | 0.505 | 0.802 |
| Standing long   | ADRA1 | 0.867  | 0.037 | 0.041 |
| Standing long   | ADRB2 | -0.003 | 0.994 | 0.985 |
| Standing long   | CHRM2 | 0.277  | 0.518 | 0.553 |
| Standing long   | OPRL1 | 0.637  | 0.136 | 0.144 |
| Standing short  | ADRA1 | 0.990  | 0.056 | 0.193 |
| Standing short  | ADRB2 | -0.866 | 0.112 | 0.093 |
| Standing short  | CHRM2 | -0.069 | 0.896 | 0.744 |
| Standing short  | OPRL1 | -0.198 | 0.712 | 0.762 |
| Walking long    | ADRA1 | 1.690  | 0.001 | 0.023 |
| Walking long    | ADRB2 | 0.523  | 0.388 | 0.516 |
| Walking long    | CHRM2 | 0.773  | 0.173 | 0.377 |
| Walking long    | OPRL1 | 1.181  | 0.035 | 0.042 |
| Walking short   | ADRA1 | 1.117  | 0.042 | 0.107 |
| Walking short   | ADRB2 | -0.001 | 0.999 | 0.290 |
| Walking short   | CHRM2 | 0.468  | 0.402 | 0.694 |
| Walking short   | OPRL1 | 0.480  | 0.393 | 0.635 |
| OHSA            | ADRA1 | 0.575  | 0.031 | 0.109 |
| OHSA            | ADRB2 | 0.257  | 0.371 | 0.765 |
| OHSA            | CHRM2 | 0.236  | 0.363 | 0.634 |
| OHSA            | OPRL1 | 0.401  | 0.143 | 0.276 |
| OHDAS           | ADRA1 | 0.960  | 0.009 | 0.022 |
| OHDAS           | ADRB2 | 0.078  | 0.849 | 0.930 |
| OHDAS           | CHRM2 | 0.299  | 0.436 | 0.533 |
| OHDAS           | OPRL1 | 0.543  | 0.159 | 0.191 |

Linear regression was performed to calculate the association between severity of symptoms and receptor activity. All analyses were adjusted for age. Adjusted p-value is defined as the p-value adjusted for the increase in heart rate from baseline to 3 minutes and for the decrease in systolic blood pressure from baseline to three minutes during orthostatic tests. B-values are shown as standard deviation from mean value. OHQ, orthostatic hypotension questionnaire; ADRA1, adrenergic receptor alpha 1; ADRB2, adrenergic receptor beta 2; CHRM2, Cholinergic receptor muscarinic 2; OPRL1, opioid receptor like 1; OHSA, Orthostatic Hypotension Symptom Assessment; OHDAS, Orthostatic Hypotension Daily Activity Scale.

**Figure S1. Heat map for the elevated cut-off values (above 75<sup>th</sup> percentile) derived from the control group shown and presented for each GPCR assays.**

| ADRA1>75 | ADRB2>75 | CHRM2>75 | OPRL1>75 |
|----------|----------|----------|----------|
| 0        | 1        | 0        | 1        |
| 0        | 1        | 0        | 1        |
| 0        | 1        | 0        | 1        |
| 0        | 1        | 0        | 1        |
| 1        | 1        | 1        | 0        |
| 0        | 1        | 1        | 0        |
| 0        | 1        | 1        | 0        |
| 1        | 1        | 1        | 1        |
| 0        | 1        | 1        | 1        |
| 0        | 1        | 0        | 1        |
| 0        | 1        | 1        | 1        |
| 0        | 1        | 1        | 1        |
| 0        | 1        | 1        | 1        |
| 1        |          |          |          |
| 1        |          |          |          |
| 1        | 0        | 0        | 1        |
| 0        | 0        | 0        | 0        |
| 1        | 0        | 0        | 0        |
| 1        | 1        | 1        | 1        |
| 0        | 0        | 1        | 0        |
| 1        | 1        |          | 1        |
| 0        | 1        | 0        | 1        |
| 0        | 1        | 1        | 1        |
|          | 0        | 0        | 0        |
| 0        | 0        | 0        | 0        |
| 0        | 0        | 0        | 1        |
| 0        | 0        | 0        | 0        |
| 0        | 1        | 1        | 1        |
| 0        | 0        | 0        | 1        |
| 0        | 1        | 1        | 1        |
| 1        | 1        | 1        | 1        |
| 1        | 1        | 1        | 1        |
| 1        | 0        | 1        | 1        |
| 1        | 1        | 1        | 1        |
| 1        | 1        | 1        | 1        |
| 1        | 1        | 1        | 1        |
| 1        | 1        | 1        | 1        |
| 1        | 1        | 1        | 1        |
| 0        | 0        | 0        | 0        |
| 1        | 1        | 1        | 1        |
| 1        | 0        | 1        | 1        |
| 1        |          | 1        | 1        |
| 0        | 0        | 0        | 0        |
| 0        | 1        | 1        | 1        |
| 1        | 0        | 1        | 1        |
| 0        | 1        | 1        | 1        |
| 1        | 0        | 0        | 1        |
| 0        | 1        | 0        | 0        |
| 1        | 1        | 1        | 1        |
| 1        | 1        | 1        | 1        |

Heat map in which red and blue boxes indicate POTS patients with a greater or lower GPCR activity than the 75<sup>th</sup> percentile of controls respectively. ADRA1, adrenergic receptor alpha 1; ADRB2, adrenergic receptor beta 2; CHRM2, Cholinergic receptor muscarinic 2; OPRL1, opioid receptor like 1.
